# Supplementary material for: Exercise leads to unfavourable cardiac remodelling and enhanced metabolic homeostasis in obese mice with cardiac and skeletal muscle autophagy deficiency
Source: PubMed Central journal article supplement (PMC5554260; doi:10.1038/s41598-017-08480-2), 2017-08-11
Supplement: 41598_2017_8480_MOESM1_ESM.pdf [file 41598_2017_8480_MOESM1_ESM.pdf]

**Exercise leads to unfavourable cardiac remodelling and enhanced metabolic homeostasis in obese mice with cardiac and skeletal muscle autophagy deficiency**

Zhen Yan<sup>2</sup>, Ana Kronemberger<sup>1</sup>, Jay Blomme<sup>1</sup>, Jarrod A. Call<sup>2,3</sup>, Hannah M. Caster<sup>1</sup>, Renata O. Pereira<sup>4</sup>, Henan Zhao<sup>2</sup>, Vitor U. de Melo<sup>1,5</sup>, Rhianna C. Laker<sup>2</sup>, Mei Zhang<sup>2</sup>, Vitor A. Lira<sup>1,2</sup>

*<sup>1</sup>Department of Health & Human Physiology, Obesity Research and Educational Initiative, Fraternal Order of Eagles Diabetes Research Center, University of Iowa, Iowa City, IA, US; <sup>2</sup>Departments of Medicine, Pharmacology, Molecular Physiology & Biological Physics, Robert M. Berne Cardiovascular Research Center, University of Virginia School of Medicine, Charlottesville, VA, US; <sup>3</sup>Department of Kinesiology & Regenerative Bioscience Center, University of Georgia, Athens, GA, US; <sup>4</sup>Department of Internal Medicine, Carver College of Medicine, University of Iowa, Iowa City, IA, US; <sup>5</sup>Department of Physiology, Federal University of Sergipe, São Cristóvão, SE, Brazil.*

**Supplementary Information**

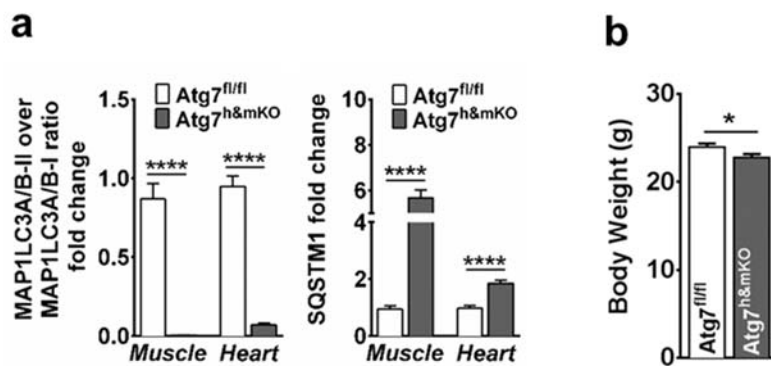

**Supplementary Figure S1. Autophagy deficiency and body weight in adult Atg7<sup>h&mKO</sup> mice.**

(a) Quantification of MAP1LC3A/B-II over MAP1LC3A/B-I ratio, and quantification of SQSTM1 normalized to tubulin alpha 1a (TUBA1A; n=11-15). (b) Body weight (n=16-17). \* $P < 0.05$  and \*\*\*\* $P < 0.0001$  as represented.

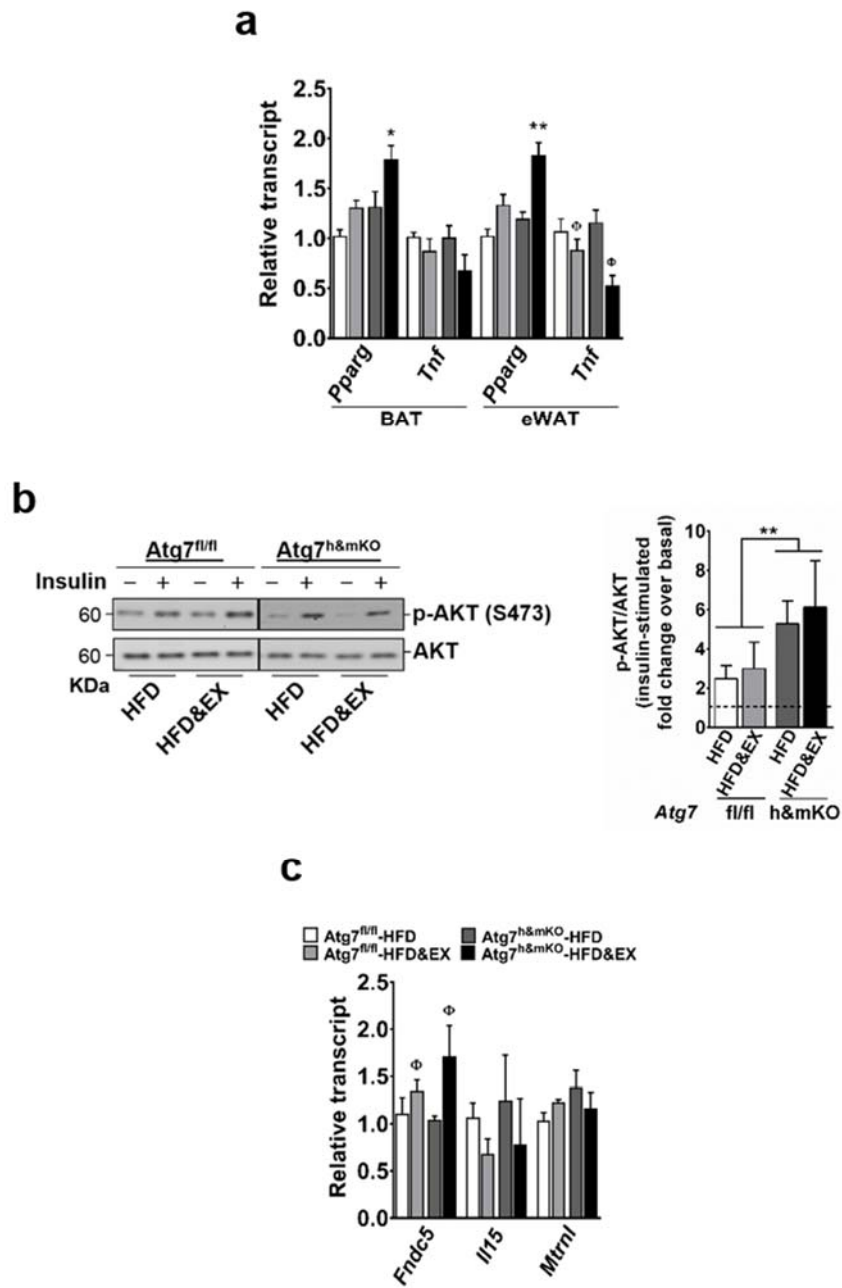

**Supplementary Figure S2. Additional analyses performed in skeletal muscle, and adipose tissues of *Atg7<sup>fl/fl</sup>* and *Atg7<sup>h&mKO</sup>* mice. (a) mRNA analysis of *Pparg* and *Tnf* in both BAT and eWAT (n=6-8). (b) Immunoblot representative images of the mean value (dividing lines indicate blots from different gels) and related quantification of phosphorylated AKT(S473) normalized to total AKT in soleus muscle under basal and insulin-stimulated conditions (dashed line represents basal AKT phosphorylation) (n=6-11). (c) mRNA analysis of putative myokine genes (n=5-9). \*\**P* < 0.01 in comparison to all other groups, unless otherwise represented; and  $\phi P$  < 0.05 in comparison to respective HFD only, sedentary group.**

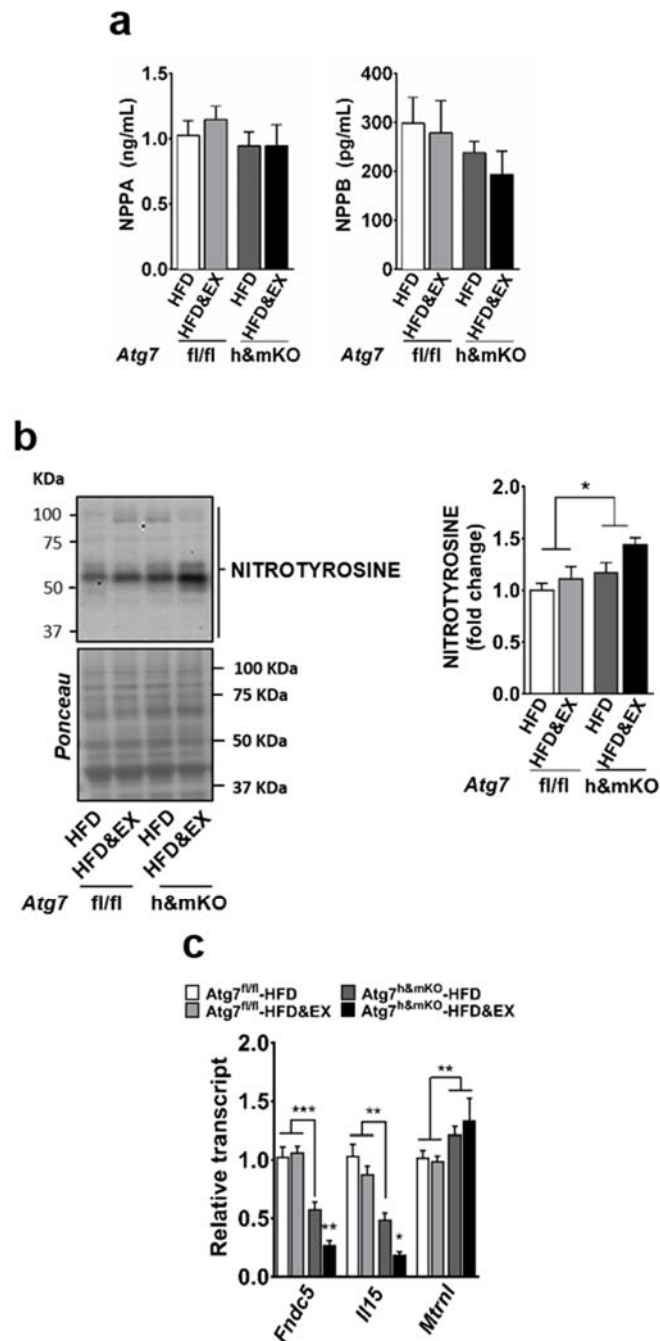

**Supplementary Figure S3. Additional analyses of circulating natriuretic peptides, nitrotyrosine and myokine genes in the heart of *Atg7<sup>fl/fl</sup>* and *Atg7<sup>h&mKO</sup>* mice.** (a) NPPA and NPPB levels in random serum (n=5-11). (b) Representative cardiac nitrotyrosine blot and quantification (n=5-6). (c) mRNA analysis of putative myokine genes in the heart (n=5-11). \**P* < 0.05, \*\**P* < 0.01 and \*\*\**P* < 0.01 in comparison to all other groups, unless otherwise represented.

### Full-length blot of Figure 3c.

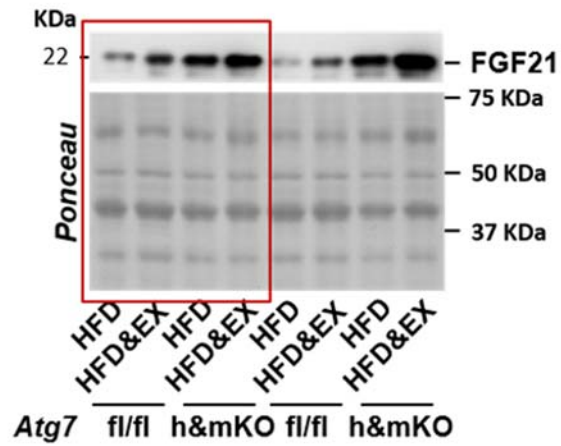

### Full-length blot of Figure 3d.

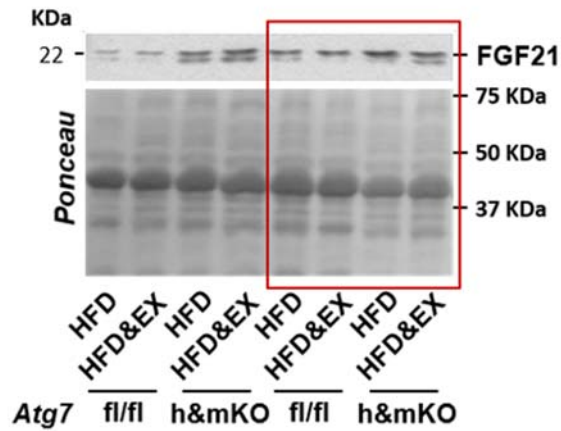

### Full-length blot of Figure 3e.

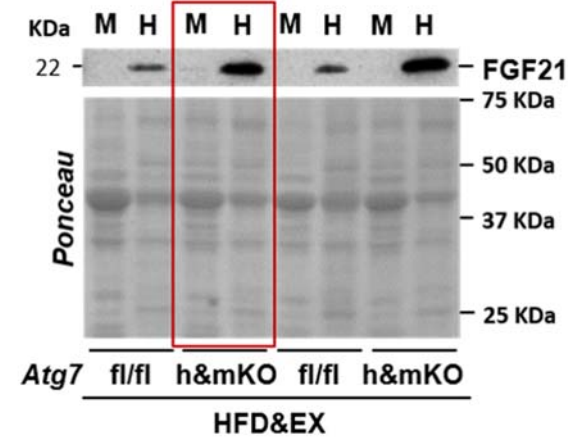

Supplementary Figure S4. Full-length blots for Figure 3.

**Full-length blot of Figure 4b.**

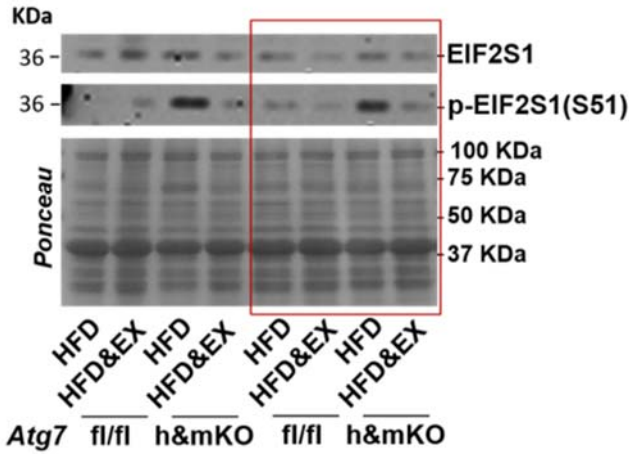

**Full-length blot of Figure 4c.**

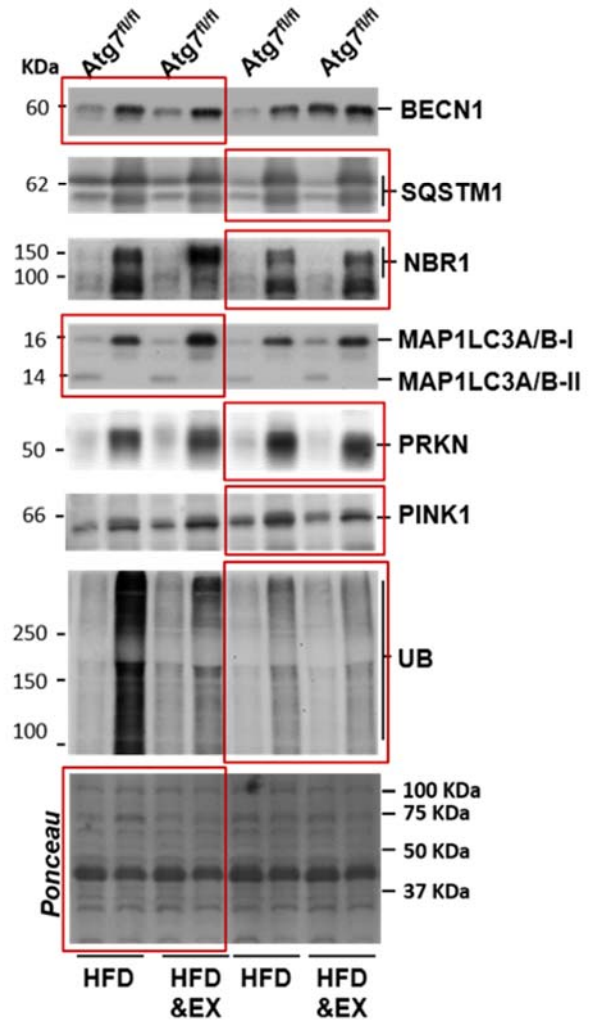

**Full-length blot of Figure 4g.**

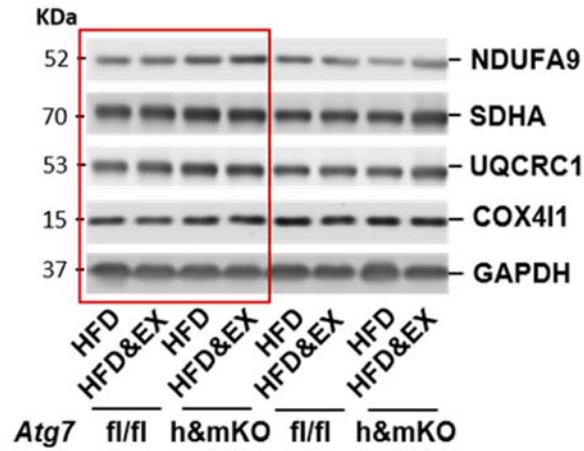

Supplementary Figure S5. Full-length blots for Figure 4.

Full-length blot of Figure 5c.

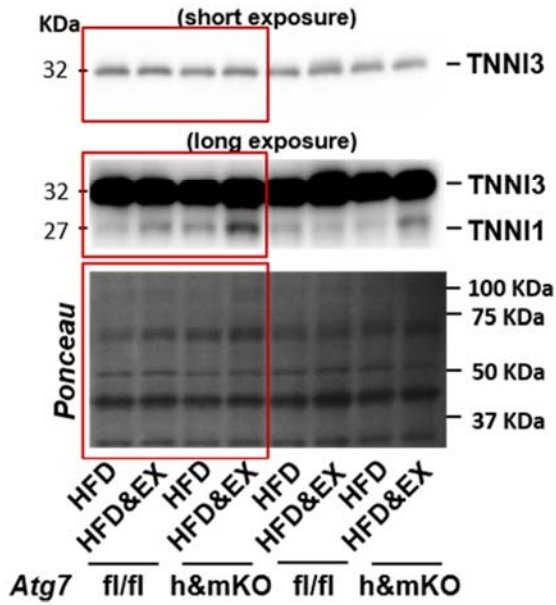

Full-length blot of Figure 5e.

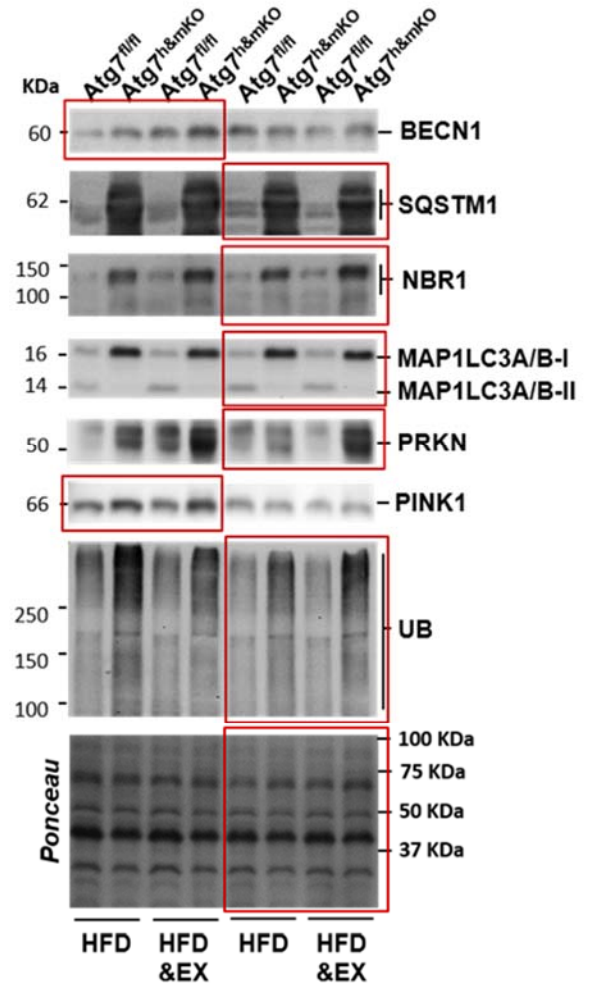

Supplementary Figure S6. Full-length blots for Figure 5.

### Full-length blot of Figure 6a.

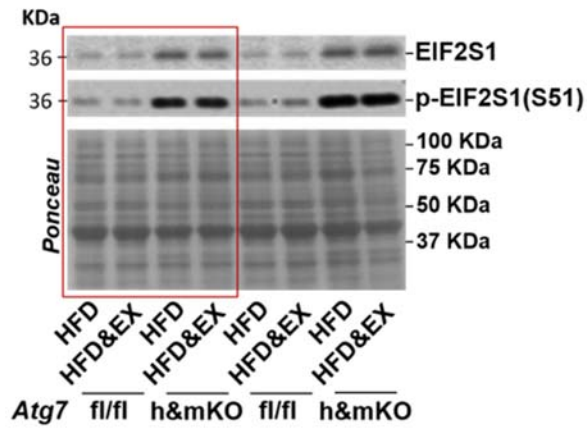

### Full-length blot of Figure 6d.

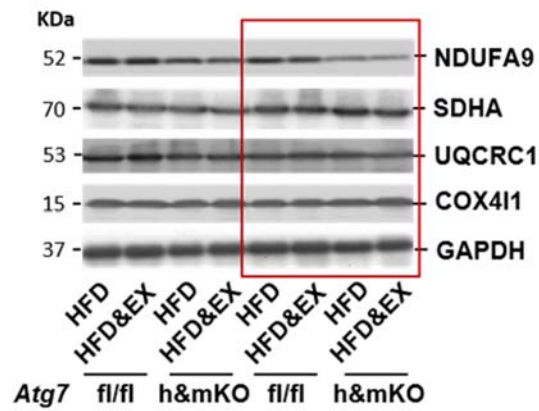

### Full-length blot of Figure 6f.

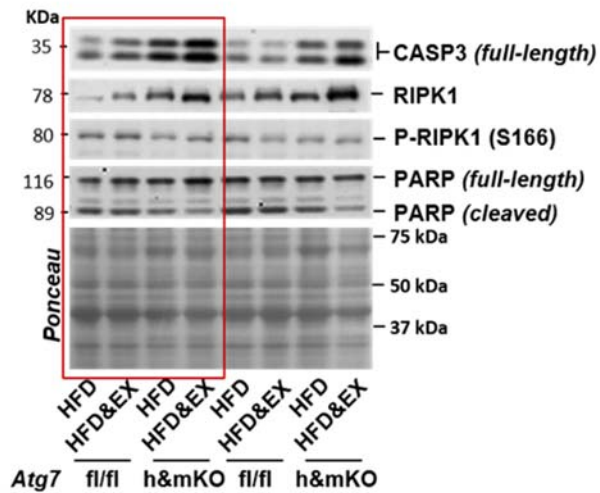

Supplementary Figure S7. Full-length blots for Figure 6.



**Supplementary Table S1. Primers used in quantitative Real-time PCR.**

| Gene                                                                | Forward and reverse primers, 5'→3'                           |
|---------------------------------------------------------------------|--------------------------------------------------------------|
| Acetyl-CoA carboxylase alpha ( <i>Acaca</i> )                       | (F) TGTACAAGCAGTGTGGGCTGGCT<br>(R) CCACATGGCCTGGCTTGGAGGG    |
| Acyl-CoA dehydrogenase, long chain ( <i>Acadl</i> )                 | (F) GGAATGAAAGCTCAGGACA<br>(R) AGAATCCGCATTAGCTGCAT          |
| Acyl-CoA dehydrogenase, medium chain ( <i>Acadm</i> )               | (F) TGCTGGAAATGATCAACAGAAG<br>(R) CATCACCTTCTTCTCTGCTTT      |
| Actin, alpha1, skeletal muscle ( <i>Acta1</i> )                     | (F) CCTGTATGCCAACACGTCA<br>(R) CTCGTCGTA CTCTGCTTGG          |
| Actin beta ( <i>Actb</i> )                                          | (F) AGCCATGTACGTAGCCATCCA<br>(R) TCTCCGGAGTCCATCACAATG       |
| Activating transcription factor 4 ( <i>Atf4</i> )                   | (F) ATGGGTTCTCCAGCGACAAG<br>(R) CCGGAAAAGGCATCCTCCTT         |
| Activating transcription factor 6 ( <i>Atf6</i> )                   | (F) TTCTCAGCTGATGGCTGTCC<br>(R) CTTGCAGCTCACTCCCAGAA         |
| Adiponectin ( <i>Adipoq</i> )                                       | (F) AGACCTGGCCACTTTCTCCTCATT<br>(R) AGAGGAACAGGAGAGCTTGCAACA |
| Autophagy related 7 ( <i>Atg7</i> )                                 | (F) GCAAGCGAAAGCTGGTCATC<br>(R) CAGGTCAGCAGGTGCTACAA         |
| Collagen type 1 alpha 1 chain ( <i>Col1a1</i> )                     | (F) CATGTTTCTGCTTTGTGGACCT<br>(R) GCAGCTGACTTCAGGGATGT       |
| Connective tissue growth factor ( <i>Ctgf</i> )                     | (F) TGACCTGGAGGAAAACATTAAGA<br>(R) AGCCTGTATGTCTTCACTG       |
| F-Box protein 32 ( <i>Fbxo32</i> )                                  | (F) GCAAACACTGCCACATTCTCTC<br>(R) CTTGAGGGGAAAGTGAGACG       |
| Fibroblast growth factor 21 ( <i>Fgf21</i> )                        | (F) TACACAGATGACGACCAAGA<br>(R) GGCTTCAGACTGGTACACAT         |
| Fibronectin 1 ( <i>Fn1</i> )                                        | (F) CGGAGAGAGTGCCCTACTA<br>(R) CGATATTGGTGAATCGCAGA          |
| Fibronectin type III domain containing 5 ( <i>Fndc5</i> )           | (F) GAAGGAGATGGGGAGGAACCAG<br>(R) TGGCGGCAGAAGAGAGCTATAA     |
| Interleukin 15 ( <i>Il15</i> )                                      | (F) GAATACATCCATCTCGTGCTA<br>(R) TTTGCAAAAACCTCTGTGAAGG      |
| Interleukin 6 ( <i>Il6</i> )                                        | (F) ACAAGTCGGAGGCTTAATTACACAT<br>(R) TTGCCATTGCACAACCTCTTTTC |
| Klotho beta ( $\beta$ - <i>klotho/Klb</i> )                         | (F) TGTTCTGCTGCGAGCTGTTAC<br>(R) TTATCCCATATTGCTTTCCCGTC     |
| Lipase E, hormone sensitive type ( <i>Lipe</i> )                    | (F) GCTGGGCTGTCAAGCACTGT<br>(R) GTAACCTGGGTAGGCTGCCAT        |
| Meteorin like, glia cell differentiation regulator ( <i>Metnl</i> ) | (F) CTGGAGCAGGGAGGCTTATTT<br>(R) GGACAACAAAGTCACTGGTACAG     |
| Myosin, heavy chain 7, cardiac muscle, beta ( <i>Myh7</i> )         | (F) CGCATCAAGGAGCTCACC<br>(R) CTGCAGCCGCAGTAGGTT             |
| Natriuretic peptide A ( <i>Nppa</i> )                               | (F) ATGGGCTCCTTCTCCATCA<br>(R) CCTGCTTCTCAGTCTGCTC           |
| Natriuretic peptide B ( <i>Nppb</i> )                               | (F) GGATCTCCTGAAGGTGCTGT<br>(R) CCTGCTTCTCAGTCTGCTC          |
| Patatin like phospholipase domain containing 2 ( <i>Pnpla2</i> )    | (F) CATGATGGTGCCCTATACTC<br>(R) GTGAGAGGTTGTTTCGTACC         |

|                                                                                          |                                                                |
|------------------------------------------------------------------------------------------|----------------------------------------------------------------|
| Perilipin 1 ( <i>Plin1</i> )                                                             | (F) GGCCTGGACGACAAAACC<br>(R) CAGGATGGGCTCCATGAC               |
| Peroxisome proliferator activated receptor gamma ( <i>Pparg</i> )                        | (F) ATCCCTGGTTTCATTAACCT<br>(R) GCTCCATAAAGTCACCAAAG           |
| Peroxisome proliferator activated receptor gamma coactivator 1 alpha ( <i>Ppargc1a</i> ) | (F) AGCCGTGACCACTGACAACGAG<br>(R) GCTGCATGGTTCTGAGTGCTAAG      |
| Pyruvate carboxylase ( <i>Pc</i> )                                                       | (F) GGAGCTTATCCCGAACATCC<br>(R) CGGAAGACGTCCATACCATT           |
| Pyruvate dehydrogenase kinase 4 ( <i>Pdk4</i> )                                          | (F) CACATGCTCTTCGAACTCTTCAAG<br>(R) TGATTGTAAGGTCTTCTTTTCCCAAG |
| Ribosomal protein Subunit S16 ( <i>Rps16</i> )                                           | (F) TGCTGGTGTGGATATTCGGG<br>(R) CCTTGAGATGGGCTTATCGG           |
| Solute carrier family 2 member 1 ( <i>Slc2a1</i> )                                       | (F) GCCCCAGAAGGTTATTGA<br>(R) CGTGGTGA GTGTGGTGGAT             |
| Solute carrier family 2 member 4 ( <i>Slc2a4</i> )                                       | (F) GTGACTGGAACACTGGTCCTA<br>(R) CCAGCCAGTTGCATTGTAG           |
| TATA-box binding protein ( <i>Tbp</i> )                                                  | (F) GAAGCTGCGGTACAATTCCAG<br>(R) CCCCTTGTACCCTTCACCAAT         |
| Transforming growth factor beta 1 ( <i>Tgfb1</i> )                                       | (F) TGGAGCAACATGTGGAAGTC<br>(R) CAGCAGCCGGTTACCAAG             |
| Tripartite motif containing 63 ( <i>Trim63</i> )                                         | (F) TGGAAACGCTATGGAGAACC<br>(R) ATTCGCAGCCTGGAAGATG            |
| Tumor necrosis factor alpha ( <i>Tnfa</i> )                                              | (F) ACAAGATGCTGGGACAGTGA<br>(R) TCCTTGATGGTGGTGCATGA           |
| Uncoupling protein 1 ( <i>Ucp1</i> )                                                     | (F) ACTGCCACACCTCCAGTCATT<br>(R) CTTTGCCTCACTCAGGATTGG         |
| Uncoupling protein 2 ( <i>Ucp2</i> )                                                     | (F) CTGGCAGGTAGCACCACAG<br>(R) AAAGGTGCCTCCCGAGATT             |
| Uncoupling protein 3 ( <i>Ucp3</i> )                                                     | (F) CCTCTACGACTCTGTCAAGC<br>(R) GACAGGGGAAGTTGTCAAGTA          |
| X-Box binding protein 1, spliced ( <i>Xbp1s</i> )                                        | (F) GAGTCCGCAGCAGGTG<br>(R) GTGTCAGAGTCCATGGGA                 |
